# Supplementary material for: Large tensile-strained BaTiO3 films grown on a lattice-mismatched La-doped BaSnO3 bottom electrode
Source: Royal Society of Chemistry journal article supplement (doi:10.1039/d4ce00197d), 2024-01-01
Supplement: d4ce00197d1.pdf [file d4ce00197d1.pdf]

## Supporting information for

### Large tensile-strained BaTiO<sub>3</sub> films grown on lattice-mismatched La-doped BaSnO<sub>3</sub> bottom electrode

Lizhikun Gong<sup>1</sup>, Ko Marunouchi<sup>1</sup>, Akira Chikamatsu<sup>2</sup>, Hiromichi Ohta<sup>3</sup>, and Tsukasa Katayama<sup>3,4\*</sup>

<sup>1</sup>Graduate School of Information Science and Technology, Hokkaido University, N14W9, Sapporo 060-0814, Japan

<sup>2</sup>Department of Chemistry, Faculty of Science, Ochanomizu University, 2-1-1 Otsuka, Bunkyo, Tokyo 112-8610, Japan

<sup>3</sup>Research Institute for Electronic Science, Hokkaido University, N20W10, Sapporo 001-0020, Japan

<sup>4</sup>JST-PRESTO, Kawaguchi, Saitama 332-0012, Japan

\*Corresponding author: katayama@es.hokudai.ac.jp

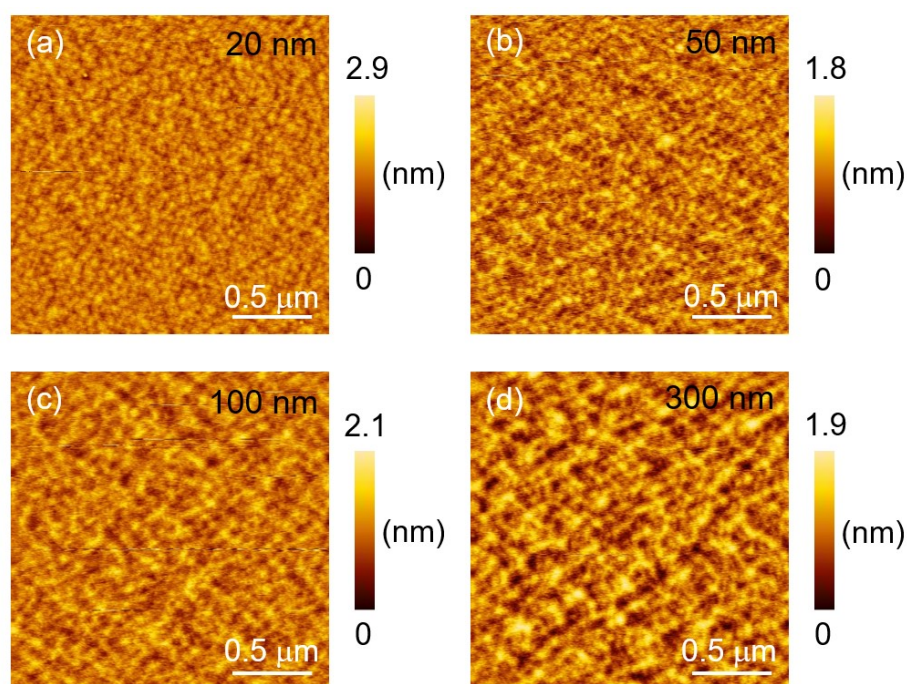

**Figure S1.** Topographic AFM images for the BaTiO<sub>3</sub> films.  $t_{\text{BTO}}$  = (a) 20, (b) 50, (c) 100, and (d) 300 nm.
